# Supplementary material for: Achievement of high efficiency and thermally stable near-infrared phosphors by designing a chromium crystallographic environment for nondestructive testing and night vision
Source: Royal Society of Chemistry journal article supplement (doi:10.1039/d2qm00569g), 2022-01-01
Supplement: d2qm00569g1.pdf [file d2qm00569g1.pdf]

**Achievement of high efficiency and thermally stable near-infrared phosphors by designing  
chromium crystallographic environment for nondestructive testing and night vision**

Guohui Wei, Panlai Li\*, Rui Li, Ye Wang, Hao Suo, Yuanbo Yang, Shaoxuan He, Jiehong Li,

Yawei Shi, Zhijun Wang\*

Hebei Key Laboratory of Optic-electronic Information and Materials, College of Physics Science &  
Technology, Hebei University, Baoding 071002, China

**Table S1** Refined crystallographic data of  $\text{InTaO}_4:\text{Cr}^{3+}$  ( $x=0-0.011$ ).

---

\*li\_panlai@126.com

\*wangzj1998@126.com

| x                             | 0               | 0.001   | 0.003   | 0.005   | 0.007   | 0.009   | 0.011   |
|-------------------------------|-----------------|---------|---------|---------|---------|---------|---------|
| Crystal System                | monoclinic-type |         |         |         |         |         |         |
| Space group                   | P2/a            |         |         |         |         |         |         |
| a (Å)                         | 5.1588          | 5.1575  | 5.1578  | 5.1582  | 5.1571  | 5.1575  | 5.1566  |
| b (Å)                         | 5.7792          | 5.7777  | 5.7779  | 5.7781  | 5.7769  | 5.7772  | 5.7761  |
| c (Å)                         | 4.8287          | 4.8274  | 4.8274  | 4.8276  | 4.8263  | 4.8265  | 4.8256  |
| Z                             | 4               |         |         |         |         |         |         |
| Cell Volume (Å <sup>3</sup> ) | 143.920         | 143.823 | 143.803 | 143.744 | 143.727 | 143.671 | 143.651 |
| R <sub>op</sub> (%)           | 8.70            | 9.05    | 8.57    | 8.96    | 8.84    | 10.02   | 8.97    |
| R <sub>p</sub> (%)            | 6.79            | 7.12    | 6.02    | 6.99    | 6.98    | 7.75    | 7.00    |
| χ <sup>2</sup>                | 1.202           | 1.292   | 1.16    | 1.223   | 1.228   | 1.554   | 1.221   |

**Table S2** Refined crystallographic data of ScTaO<sub>4</sub>:Cr<sup>3+</sup> (x=0- 0.011).

| x                             | 0               | 0.001   | 0.003   | 0.005   | 0.007   | 0.009   | 0.011   |
|-------------------------------|-----------------|---------|---------|---------|---------|---------|---------|
| Crystal System                | monoclinic-type |         |         |         |         |         |         |
| Space group                   | P2/a            |         |         |         |         |         |         |
| a (Å)                         | 5.1876          | 5.1575  | 5.1237  | 5.1145  | 5.1103  | 5.1073  | 5.1052  |
| b (Å)                         | 5.7781          | 5.7772  | 5.6802  | 5.6674  | 5.6635  | 5.6593  | 5.6572  |
| c (Å)                         | 4.8277          | 4.8265  | 4.8263  | 4.8072  | 4.8033  | 4.7995  | 4.7971  |
| Z                             | 4               |         |         |         |         |         |         |
| Cell Volume (Å <sup>3</sup> ) | 143.771         | 143.691 | 143.665 | 143.286 | 142.747 | 142.571 | 142.441 |
| R <sub>op</sub> (%)           | 8.42            | 9.05    | 8.57    | 8.97    | 8.98    | 9.05    | 8.97    |
| R <sub>p</sub> (%)            | 7.92            | 7.85    | 7.86    | 7.99    | 7.68    | 7.75    | 7.78    |
| χ <sup>2</sup>                | 2.245           | 1.992   | 2.216   | 2.41    | 1.998   | 2.134   | 2.129   |

**Table S3** Refined crystallographic data of GaTaO<sub>4</sub>:Cr<sup>3+</sup> (x=0- 0.011).

| x              | 0               | 0.001  | 0.003  | 0.005  | 0.007  | 0.009  | 0.011  |
|----------------|-----------------|--------|--------|--------|--------|--------|--------|
| Crystal System | monoclinic-type |        |        |        |        |        |        |
| Space group    | P2/a            |        |        |        |        |        |        |
| a (Å)          | 4.5936          | 4.5934 | 4.5930 | 4.5928 | 4.5863 | 4.5828 | 4.5755 |
| b (Å)          | 5.5717          | 5.5711 | 5.5710 | 5.5684 | 5.5664 | 5.5620 | 5.5598 |
| c (Å)          | 4.9680          | 4.9666 | 4.9660 | 4.9631 | 4.9615 | 4.9588 | 4.9561 |

| Z                             | 4       |         |         |         |         |         |         |
|-------------------------------|---------|---------|---------|---------|---------|---------|---------|
| Cell Volume (Å <sup>3</sup> ) | 127.150 | 127.099 | 127.067 | 127.007 | 126.990 | 126.702 | 126.607 |
| R <sub>op</sub> (%)           | 9.95    | 9.65    | 8.69    | 8.43    | 8.54    | 8.02    | 8.97    |
| R <sub>p</sub> (%)            | 7.56    | 7.22    | 6.95    | 6.86    | 6.92    | 6.75    | 7.38    |
| χ <sup>2</sup>                | 2.505   | 2.794   | 2.265   | 2.443   | 2.678   | 2.362   | 2.267   |

**Table S4** Content ratio of each element of GaTaO<sub>4</sub>:Cr<sup>3+</sup>

| Element | Atomic (%) |
|---------|------------|
| O       | 84.8       |
| Ga      | 18.8       |
| Ta      | 37.2       |
| Cr      | 0.7        |

**Table S5** Content ratio of each element of ScTaO<sub>4</sub>:Cr<sup>3+</sup>

| Element | Atomic (%) |
|---------|------------|
| O       | 64.4       |
| Sc      | 23.2       |
| Ta      | 51.9       |
| Cr      | 1.1        |

**Table S6** Content ratio of each element of InTaO<sub>4</sub>:Cr<sup>3+</sup>

| Element | Atomic (%) |
|---------|------------|
| O       | 54.1       |

|           |             |
|-----------|-------------|
| <b>In</b> | <b>21.9</b> |
| <b>Ta</b> | <b>22.3</b> |
| <b>Cr</b> | <b>1.7</b>  |

**Table S7.** Calculation of the relative formation energy of GaTaO<sub>4</sub> and Ga[Ta<sub>Cr</sub>]O<sub>4</sub>.

| <b>Substituting model</b>    | <b>GaTaO<sub>4</sub></b> | <b>GaTa<sub>Cr</sub>O<sub>4</sub></b> |
|------------------------------|--------------------------|---------------------------------------|
| <b>Formation energy (eV)</b> | <b>-14.3671 eV</b>       | <b>-8.6370 eV</b>                     |

#### **Measurements of quantum efficiency**

The quantum efficiency (QE) measurement was performed at room temperature by using a HORIBA FLuorolog3 fluorescence spectrometer with a 450 W Xe lamp. The IQE is defined as the percentage of the number of emitted photons to that of absorbed photons, which can be calculated using the following equation:

$$IQE = \frac{\int L}{\int E_R - \int E_S} \quad (1)$$

$L$  is the luminescence spectrum of the sample,  $E_S$  is the excitation spectrum of the sample, and  $E_R$  is the excitation spectrum referenced by BaSO<sub>4</sub>. In addition, the EQE is defined as the percentage of the number of emitted photons to the number of exciting photons:

$$EQE = \frac{\int E_R}{\int E_R} \times 100\% \quad (2)$$

The absorption efficiency (AE) is defined as the percentage of the number of absorbed photons (by the sample) to that of excitation photons:

$$AE = \frac{\int E_R - \int E_S}{\int E_R} \times 100\% \quad (3)$$

### Measurements of Huang–Rhys factor (S)

$$FWHM = 2.36\sqrt{S}\hbar\omega\sqrt{\coth\left(\frac{\hbar\omega}{2kT}\right)} \quad (4)$$

where the  $FWHM$  (eV) is the full width at half maximum of emission spectrum at temperature  $T$ (K), and the  $\hbar\omega$  and  $k$  are the phonon energy and Boltzmann's constant, respectively.

$$\coth(x) = \frac{e^x + e^{-x}}{e^x - e^{-x}} \quad (5)$$

$$FWHM^2 = 5.57 \times S \times (\hbar\omega)^2 \left(1 + \frac{1}{\frac{\hbar\omega}{e^{kT}} - 1}\right) \quad (6)$$

$$\frac{\hbar\omega}{kT} \approx 10^{-3} \quad (7)$$

$$FWHM^2 = 5.57 \times S \times (\hbar\omega)^2 \left(1 + \frac{1}{\frac{\hbar\omega}{2kT}}\right) \quad (8)$$

$$FWHM = a + b \times 2kT \quad (9)$$

$$a = 5.57 \times S \times (\hbar\omega)^2 \quad (10)$$

$$b = 5.57 \times S \times (\hbar\omega)^2 \quad (11)$$

Straight-line fitting equation:

$$\text{InTaO}_4: y = 0.36454x + 0.00454$$

$$\text{ScTaO}_4: y = 0.57179x + 0.01892$$

$$\text{GaTaO}_4: y = 0.39389x + 0.01987$$

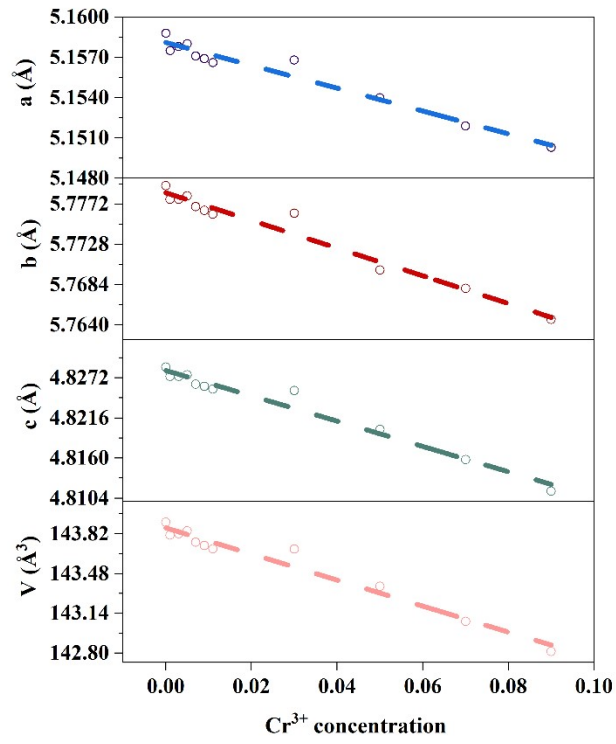

**Figure S1** The trend of volume change of *a*, *b*, *c*, *V* of InTaO<sub>4</sub>: xCr<sup>3+</sup> (*x*=0-0.1).

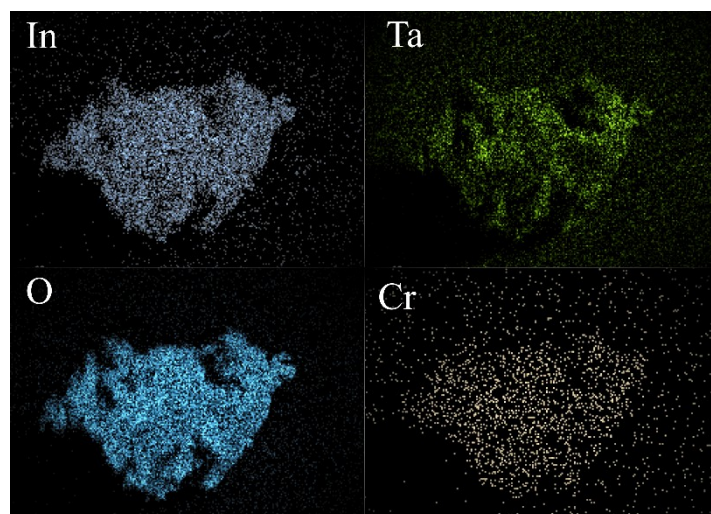

**Figure S2** Mapping of InTaO<sub>4</sub>:Cr<sup>3+</sup>.

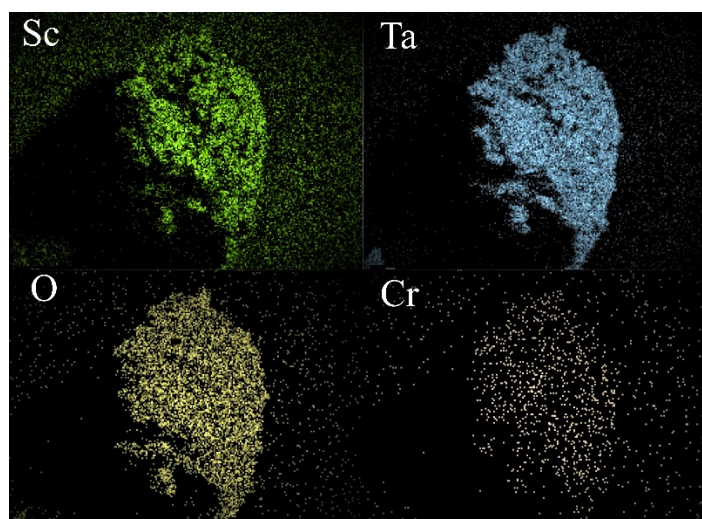

**Figure S3** Mapping of ScTaO<sub>4</sub>:Cr<sup>3+</sup>.

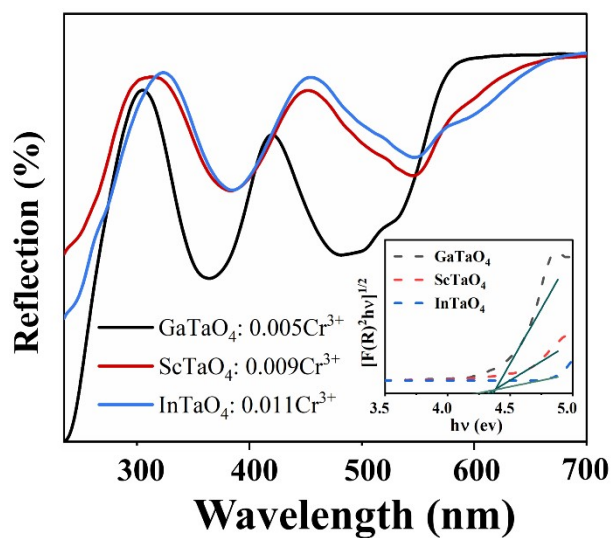

**Figure S4** The diffuse reflectance spectra (DRs) of  $\text{XTaO}_4:\text{Cr}^{3+}$  ( $\text{X}=\text{Ga}, \text{Sc}, \text{In}$ ). The inset shows the  $\text{XTaO}_4$  ( $\text{X}=\text{Ga}, \text{Sc}, \text{In}$ ) host of linear relationship with  $[\text{F}(\text{R})^2\text{h}\nu]^{1/2}$  and  $\text{h}\nu$ .

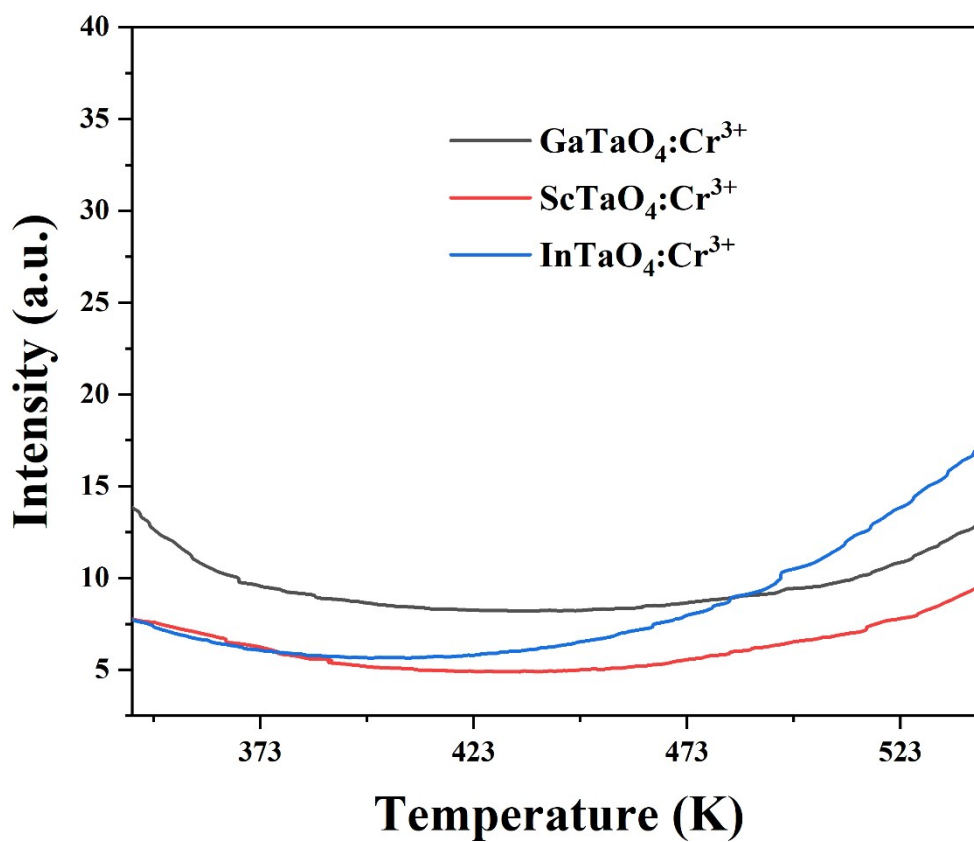

**Figure S5** The thermoluminescence spectra of  $\text{XTaO}_4:\text{Cr}^{3+}$  ( $\text{X}=\text{Ga}, \text{Sc}, \text{and In}$ ).



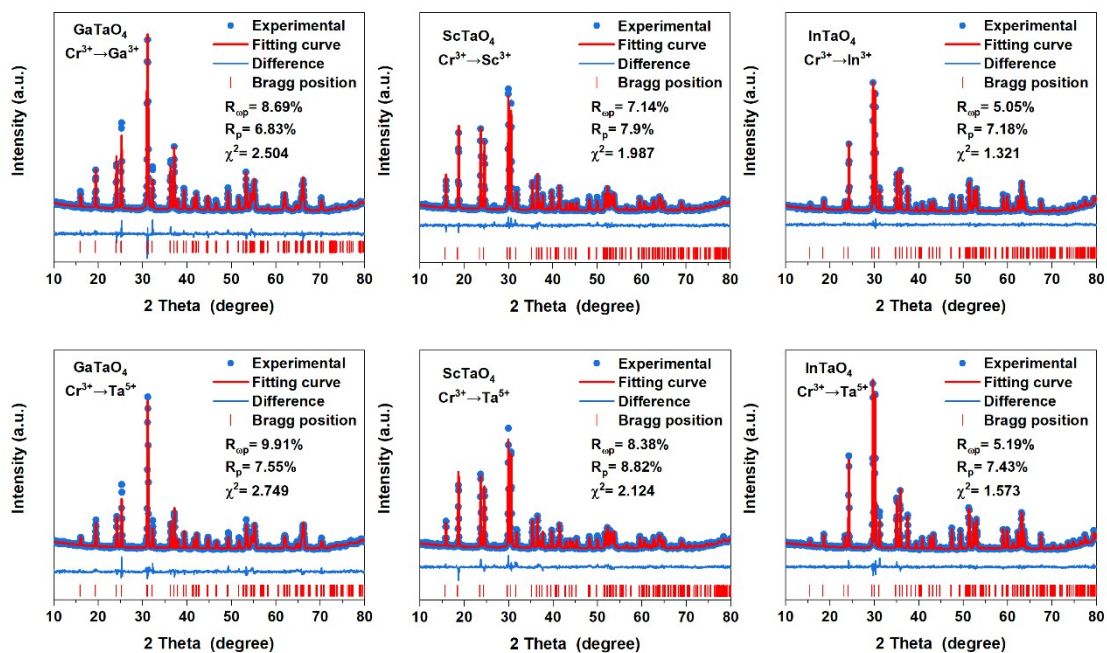

Figure S6 Rietveld refinement of XRD results of  $\text{X}^{3+}$  and  $\text{Ta}^{5+}$  ions are substituted by  $\text{Cr}^{3+}$  ions, respectively.

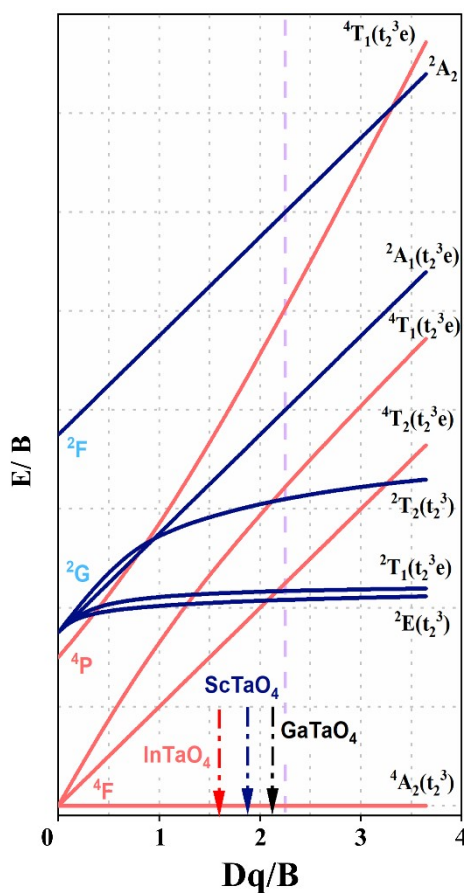

Figure S7 T-S diagram of  $\text{Cr}^{3+}$  at an octahedron crystal environment.

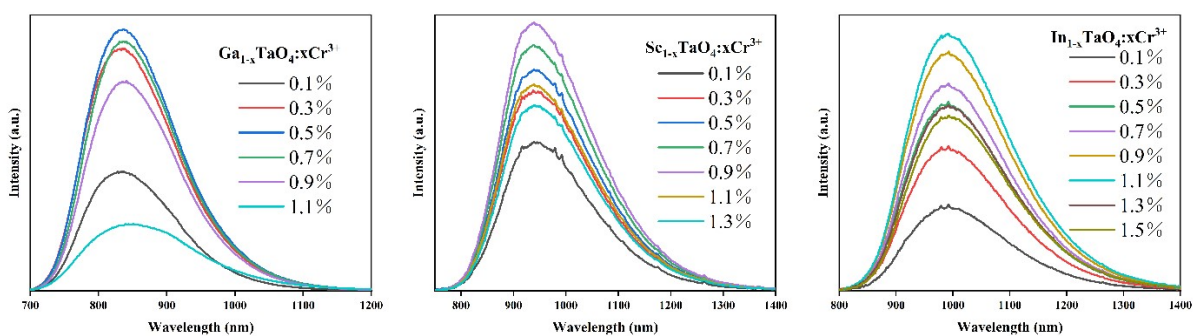

**Figure S8** The PL spectrum of  $\text{XTaO}_4:\text{Cr}^{3+}$  (X=Ga, Sc, In).

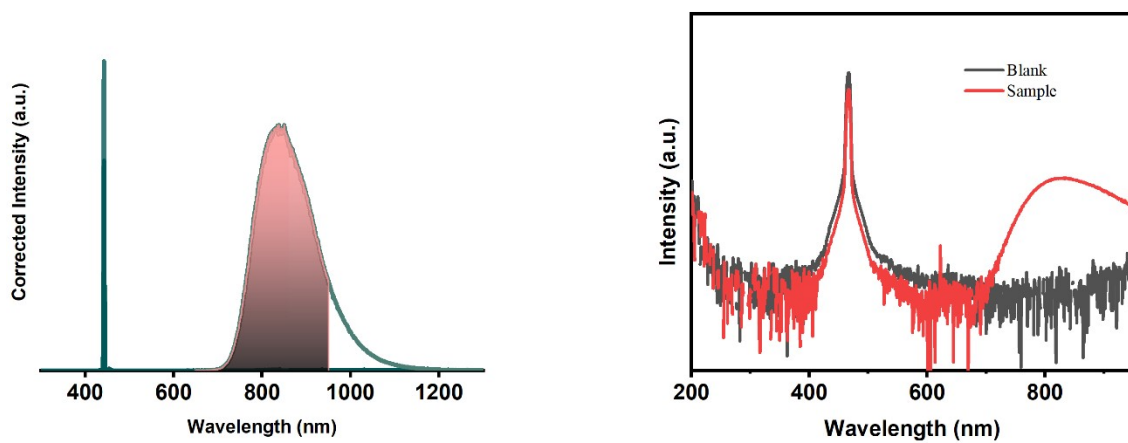

**Figure S9** The luminescent spectra for the IQE of  $\text{GaTaO}_4:0.005\text{Cr}^{3+}$ .

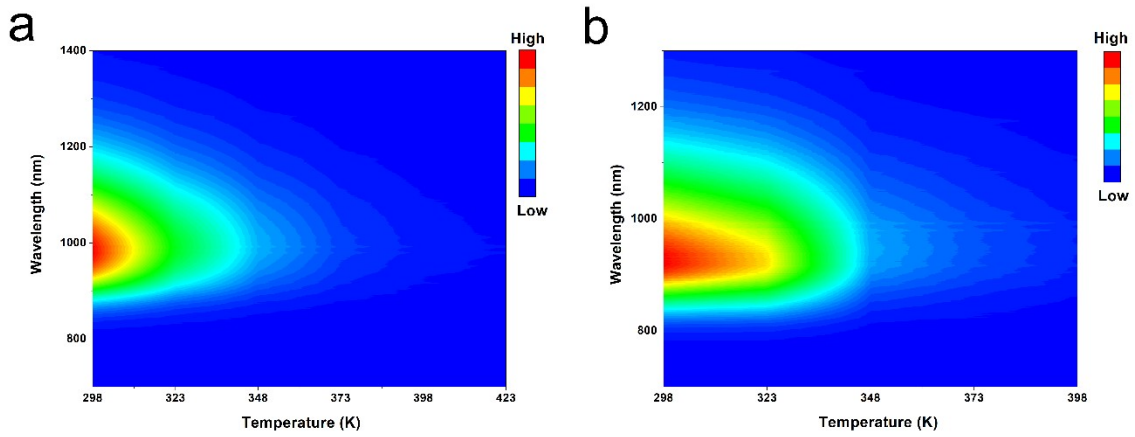

Figure S10 Temperature-dependent PL spectra of samples  $\text{ScTaO}_4:0.009\text{Cr}^{3+}$  and  $\text{InTaO}_4:0.011\text{Cr}^{3+}$ .

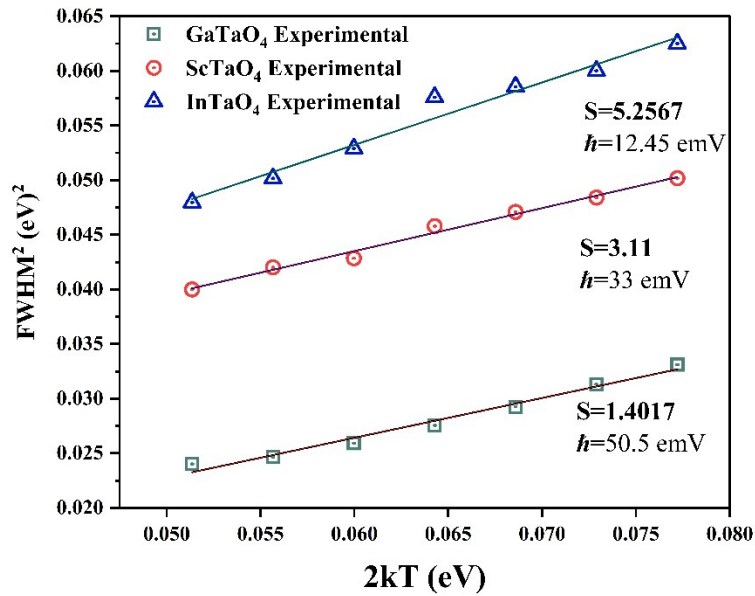

Figure S11 Fitting results of  $\text{FWHM}^2$  as a function  $2kT$ .

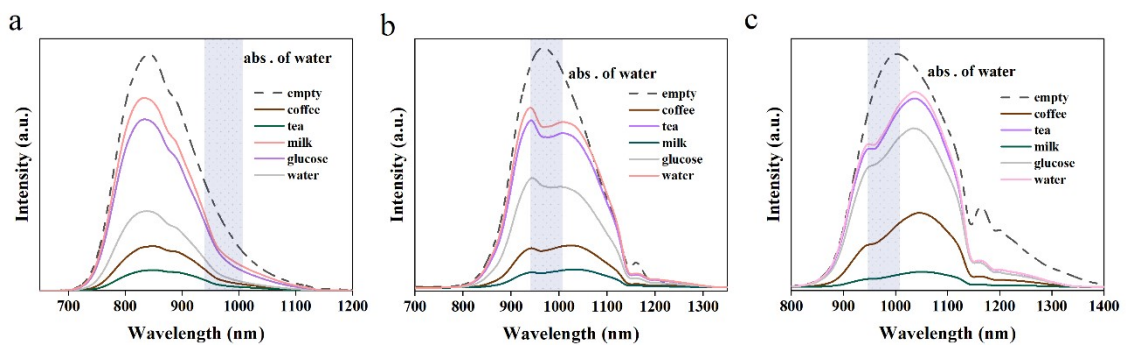

**Figure S12** Spectra of LEDs coupled with  $\text{XTaO}_4$  (X= Ga, Sc, and In) penetrating five different solutions respectively
